# Supplementary material
Source: PubMed Central journal article supplement (PMC1885623)

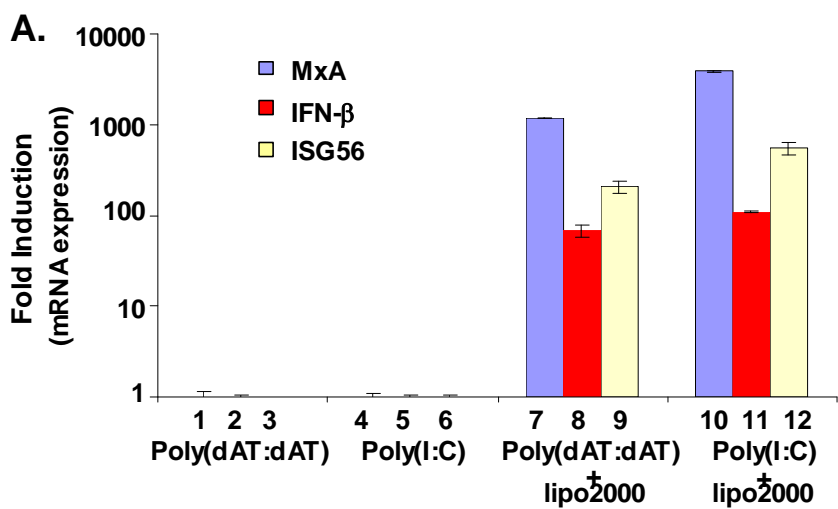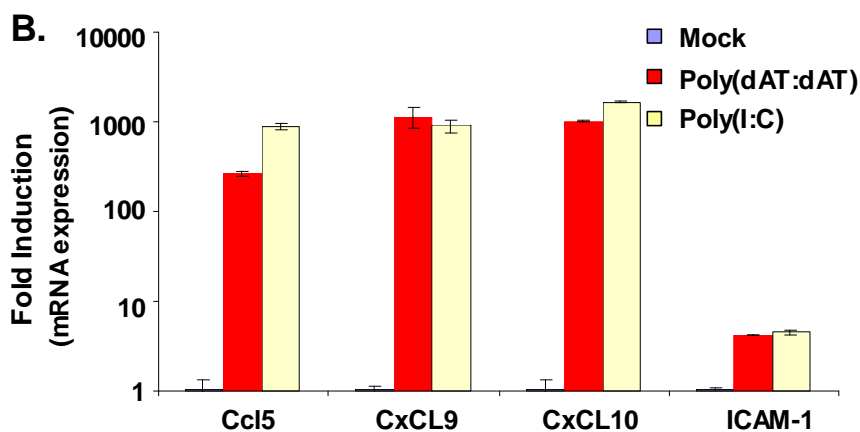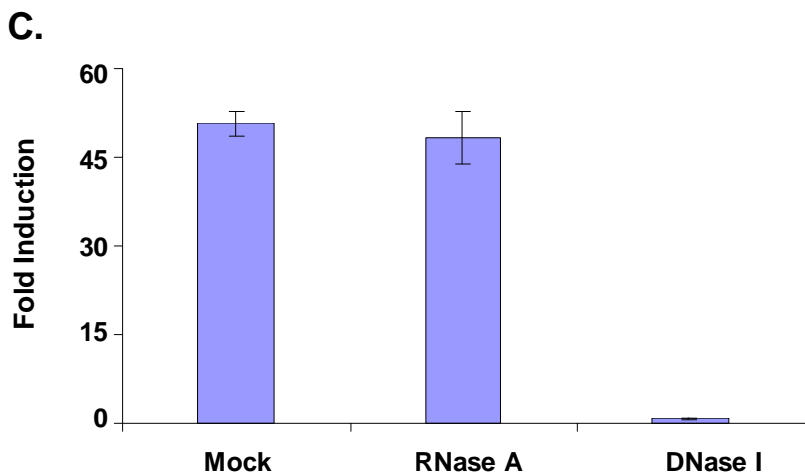

Supplement: pnas_0703285104_1.pdf [file pnas_0703285104_1.pdf]

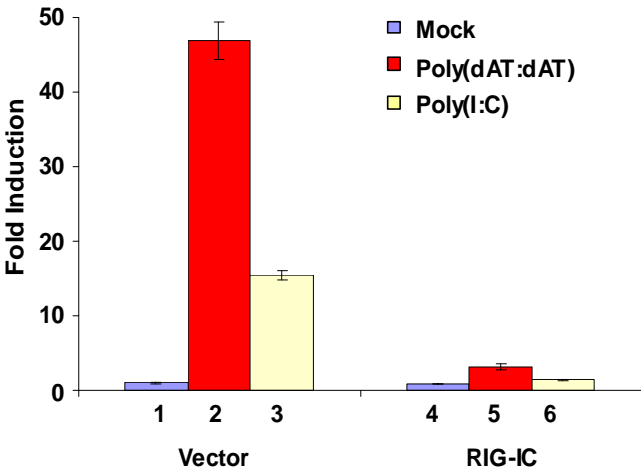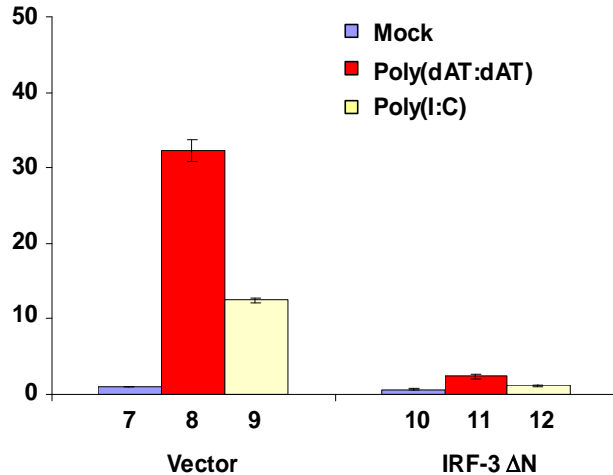

Supplement: pnas_0703285104_2.pdf [file pnas_0703285104_2.pdf]

**IRF3**

**DAPI**

**Mock**

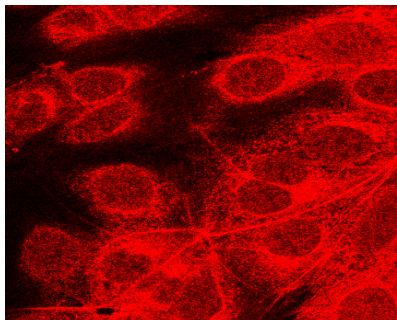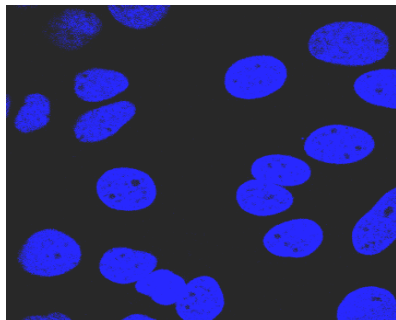

**Poly  
(dAT:dAT)**

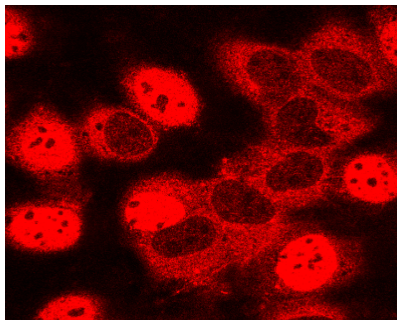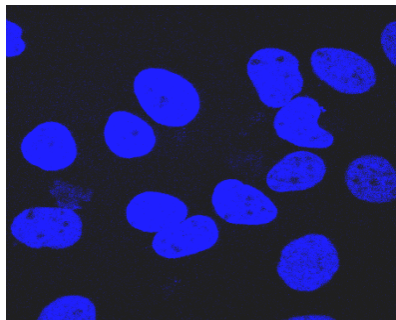

**poly(I:C)**

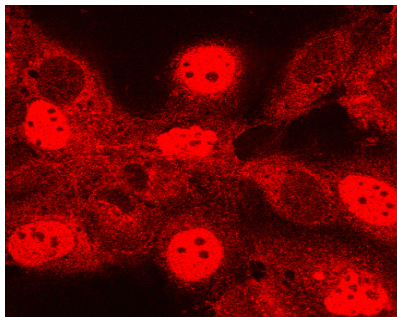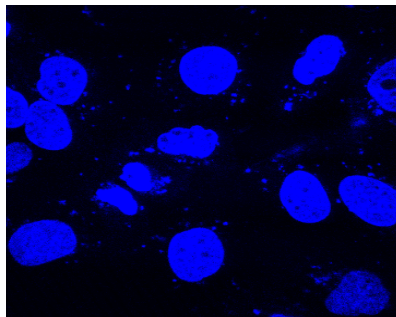

Supplement: pnas_0703285104_3.pdf [file pnas_0703285104_3.pdf]

**A.**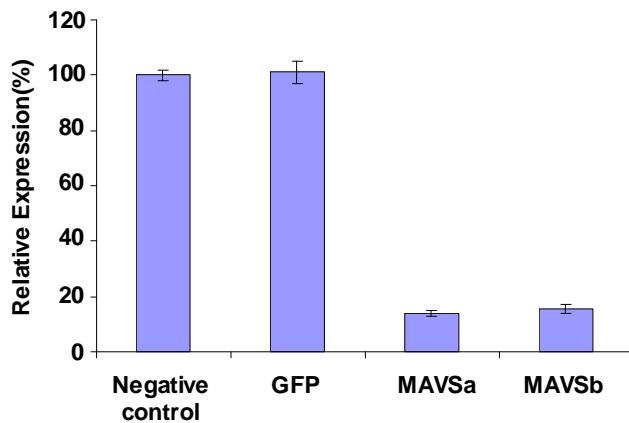**B.**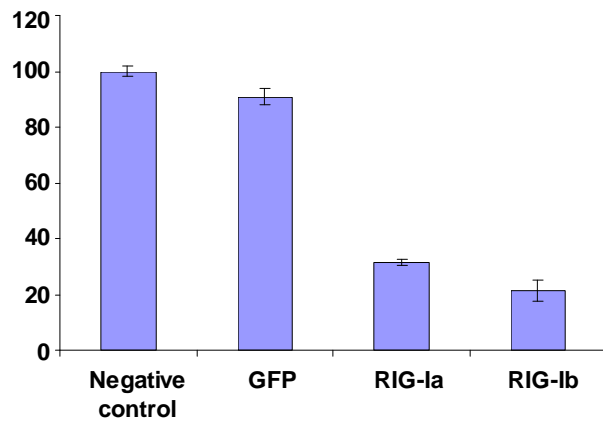**C.**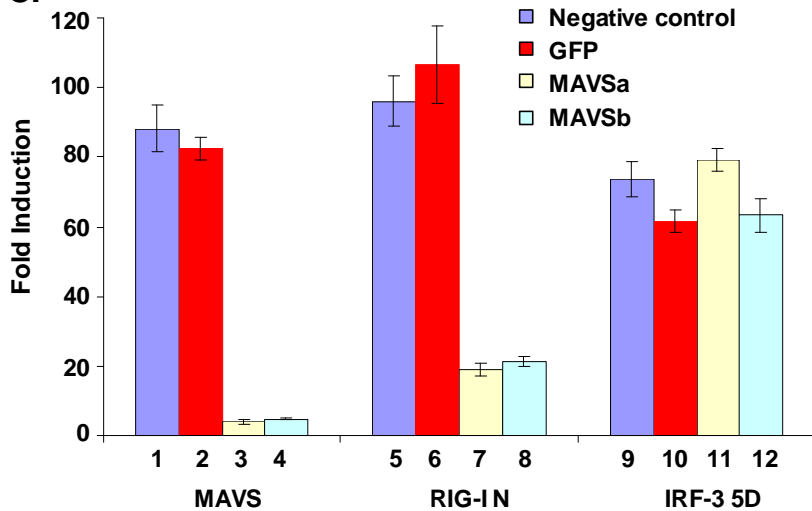

Supplement: pnas_0703285104_4.pdf [file pnas_0703285104_4.pdf]

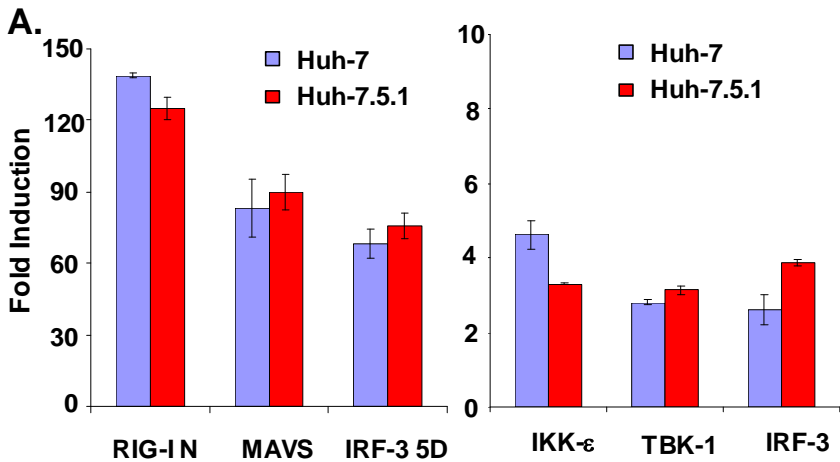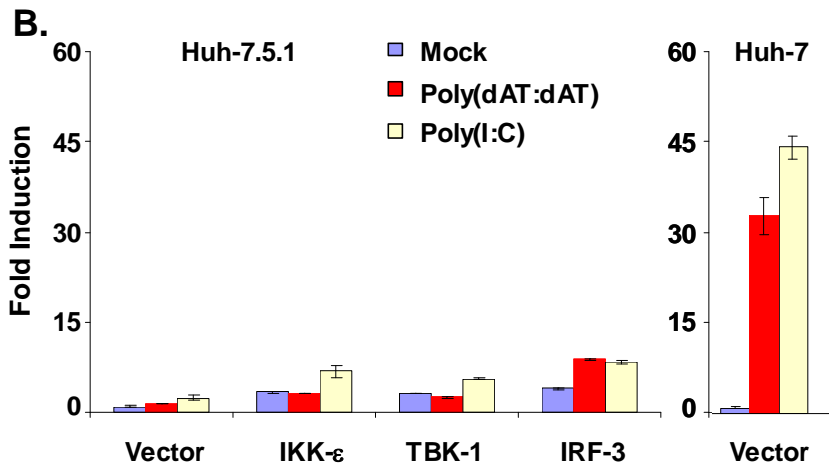

Supplement: pnas_0703285104_5.pdf [file pnas_0703285104_5.pdf]
